# Supplementary material for: Lymphotoxin-LIGHT Pathway Regulates the Interferon Signature in Rheumatoid Arthritis
Source: PubMed Central journal article supplement (PMC4236099; doi:10.1371/journal.pone.0112545), 2014-11-18

## Supplemental Methods:

### *Analyses of whole blood RNA:*

Whole blood was collected from all patients into PaxGene tubes at pre-treatment (week 0), after 6 and 14 weeks of treatment in TNF-IR and at 0 and 14 weeks in DMARD-IR. RNA was extracted, processed and hybridized to Affymetrix microarrays using the globin-signal reduction protocol as described (1,2). The RNA was profiled using the same high-throughput Affymetrix chip HTHGU133plusPM platform. RNA profiles from each of the two trials were normalized and QC'ed separately using the GCRMA method implemented in BioConductor. This cross-trial normalization was only employed for the comparison of IFN signatures between RA and SLE and the correlation between IFN status and lymphopenia. Samples with high variation in normalized un-scaled standard error and relative log error were removed. We also excluded from further analysis samples with high RNA degradation rates (>4). Transcriptional profiles from a total of 759 samples from 389 patients (DMARD-IR) and 325 samples from 110 patients (TNF-IR) passed control. Gene expression signatures for IFN and Type II IFN were created based on the genes listed in supplementary figure 1. Scores were the geometric means of the microarray signals after normalization. To compare expression values across the RA and SLE studies, the individual values for  $\beta$ -actin expression were subtracted from the normalized gene score. Baseline transcriptional profiling datasets are deposited at GEO, GSE45291.

RNAs from all TNF-IR patients and the 0, 70 and 200 mg q2w cohorts from DMARD-IR were analyzed at weeks 0 and 14 by qPCR using the Fluidigm® analyzer. SLE patient samples were not analyzed by qPCR. A total of 659 RNA samples passed quality control including 17 controls, 436 DMARD-IR (207 data pairs week 0-14) and 207 TNF-IR (94 data pairs weeks 0-14). Primer sets for the Fluidigm® analyses are listed below. Cycle thresholds were averaged from quadruplicate analyses and normalized to UBC and YWHAZ. The values were then normalized to the mean of the values from 17 control subjects. The 3-gene qPCR IFN score was the average of ISG15, Ly6E and OAS1 values and the range of each of the individual values was roughly similar indicating approximately equal weighting.

### *IFN Reporter Assay*

An assay similar to one previously published was employed (3). Confluent layers of A549 or WISH cells were cultured in 96 well plates in test serum at a 1:5 dilution for 24 hours. The cells were lysed in a detergent solution and the lysate was assayed for Mx1 content using a conventional ELISA with a pair of Mx1 specific antibodies (developed at Biogen Idec).  $ED_{50}$  for IFN $\alpha$ 4, IFN $\beta$  and IFN $\gamma$  was 1, 15 and 400 IU/ml respectively using the A549 cells and 5, 9 and 9 IU/ml with WISH cells. The A549 based assay had a lower limit of quantitation of about 0.3-1.0 IU/ml or about 1.5-5 pg/ml and has been validated for detection of IFN $\beta$  (Avonex®) in human serum. This level of sensitivity is similar to assays based on MHC class I expression or better than typical antiviral or anti-proliferative readouts (3). Reference human  $\alpha$  and  $\omega$  interferons were obtained from PBL Interferon Source and IFN- $\beta$  was from Biogen Idec.

### *Statistics*

Analyses were performed using Prism software (GraphPad). Unless specified otherwise, two-tailed Mann-Whitney tests were used to determine significance and either p values are noted or indicated as \* p < 0.05, \*\* p < 0.01, \*\*\* p < 0.001, \*\*\*\* p < 0.0001. Correlations were assessed with the Spearman rank analysis. In the DMARD-IR trial, there were 391 patients with 365 (93%) completing. The TNF-IR trial was terminated early due to the lack of efficacy in DMARD-IR. In that study, 114 patients were dosed of which 81 completed. An additional 15 patients completed at least 2 months weeks of dosing and, in those cases, the last observation was carried forward for all lymphocytosis, qPCR, CRP, ESR and SJC analyses. In the DMARD-IR study, qPCR data from one patient each from the placebo and 70 mg q2w groups was excluded as the baseline IFN signature score was greater than +5. These patients were also identified by a ROUT outlier analysis for non-parametric data (Q = 0.1%) and these were the only two RA patients with such high baseline scores in both trials.

## Supplemental Methods Continued:

Primer sets for quantitative PCR used in this paper. Five probe sets had some failed reactions: CLIC3 (94% successful), KIR2DL1 (74% ), KIR2DS1 (99%), LILRA4 (89%) and UBD (92%), n =301 patients.

| Gene      | Common Name     | Target                 | Forward                   | Reverse                     | Probe                       |
|-----------|-----------------|------------------------|---------------------------|-----------------------------|-----------------------------|
| Cd1e      | CD1E            | DC                     | GGAAGACACGCCTAAACCAACT    | GTTTAAGAAGATGCAGACAAGGATTTT | 6FAM-TGGTGACATTTGCTTTAC     |
| Cd8b      | CD8 beta        | CD8 T Cells            | CGCAGGACAGCATCACCAT       | TCCAGCAGACCCCTGCATAC        | 6FAM-TGTTGGTTTGCACCTTT      |
| Clec4c    | BDCA2           | pDC                    | AAAGAACCACACCCCGAAAGT     | GGTGGGTGCAGAAGCTCTTG        | 6FAM-ACATCTTTGGAGAAAGTGAT   |
| Clic3     | CLIC3           | NK                     | CCAGCGTCTCTCCAGAAAG       | CGTTTTCCACGCCAAGACA         | 6FAM-CCTCGATCGCAGCGTG       |
| Defa3     | Defensin A3     | Imm Neutrophil         | AGCCCCGGAGCAGATGG         | TGCAAGGGAAACAACCACTTC       | 6FAM-AGCGGACATCCC           |
| G1p2      | ISG15           | IFN ISG                | TGGCGGGCAACGAATT          | GGGTGATCTGCGCTTCA           | 6FAM-TGAGCAGCTCCATGTC       |
| Gapdh     | GAPDH           | Housekeeping           | ACCACCAAGCCAGCAA          | GGGACTCCCCAGCAGTA           | 6FAM-AGCACAAAGAGGAAAGAGA    |
| Ifi27     | IFI27           | IFN ISG                | CAGTGCCATGGGCTTCACT       | ACATCATCTTGGCTGCTATGGA      | 6FAM-CGGGAATCGCCTCGT        |
| Itgae     | Integrin alphaE | Integrin alphaE        | AACAGCTCCATGCTGCTAGAT     | GACCCAGCATCCTTTGCATT        | 6FAM-ATCCTGAAGGAAAAAG       |
| Itgb7     | Integrin Beta 7 | Integrin Beta 7        | CAGCATGGACAGGTGAGGATT     | AGAGTGAATTGGAGCCCAAGA       | 6FAM-CCATTCTGTGGCATCC       |
| Kir2dl1   | KIR2DL1         | NK                     | GTTTTCCCTCCTTCAAATAAACATG | TTAGGCAAGAAAAGAGTCCCATTAC   | 6FAM-CTGCCCTCATGGTTT        |
| Kir2ds1   | KIR2DS1         | NK                     | TCCCGGAGCTCTATGACAT       | GCAGGGAGCCTACGTTTATG        | 6FAM-TACCATCTATCCAGGGAAG    |
| Kir3dl1   | KIR3DL1         | NK                     | AAAGTTGTCTCTGCCATGA       | GGGCTGTTGTCTCCAGAAAG        | 6FAM-CACCACAGTCAGGCC        |
| Klrd1     | KLRD1           | NK                     | CCGGTGCAACTGTACTTCATTT    | GATGCCGACTTTCGTTCCA         | 6FAM-CAGTGAACAGAAAAAC       |
| Klrf1     | KLRF1           | NK                     | AAAGGGACCAGCTAAAGAAAAACG  | TGCTGAGGTTTCAGAGAAAAAT      | 6FAM-TGTGCTGCCATTAAG        |
| Lilra4    | ILT7            | pDC                    | CCCCCTCTTGTGCAGAAG        | AAGGTGACCTCTGTGTGTCAGT      | 6FAM-AAAGTGAACATCGGGTCC     |
| Ly6e      | LY6E            | Monocytes, IFN ISG     | TCCAGAAGGCGTCAATGTT       | CGCACTGAAATGCACAGAAA        | 6FAM-TGGCTCCATGGGC          |
| Ms4a1     | CD20            | B Cells                | ATGAAAGGCCCTATTGCTATGC    | CAGTGAAGACATCCTCTGAAGAG     | 6FAM-TCTGGTCCAAAAACC        |
| Oas1      | OAS1            | IFN ISG                | CACAGCCAGGATTTCCG         | TTGTCCAGTAGATGCAGAGTTGCT    | 6FAM-CITGGAATTAGTCATAAACTAC |
| Rsad2     | RSAD2           | IFN ISG                | GTTGACATGGAGGCAAGTCTT     | CAGCCTCATGTGGCCAGAT         | 6FAM-CATTGCTTTGTTCCGCTAT    |
| Siglec1   | SIGLEC1         | Monocytes IFN ISG      | CAAGGGAGACTGGGAAATGTAGTTT | ATTCCTCAACAATGTCAAAGTCTCA   | 6FAM-AGGACATTTGGAATTTGGA    |
| Slamf7    | SLAMF7          | Monocytes, Act Mac, DC | TGTGCATGGCCCAAGGA         | TGCAGCAAGATGCATAAATGA       | 6FAM-AGGACCTCCAGCCAGG       |
| Sparc     | SPARC           | Monocytes              | ACCGATTCAACCACTCACTTT     | CAGCCAGGAAGGCCAAAA          | 6FAM-CTTTCTACATCTCACTCTTG   |
| Tnfrsf10c | TRAIL-R3        | Neutrophils            | AAAGTTCGTCTGCTCATCGT      | GCAGTGGTGGCAGAGTAAGCT       | 6FAM-CGGTCTGCTGCCAG         |
| Tra@      | TCR alpha       | αβ T Cells             | CTGACCCTGCCGTGATCCA       | TCGGTGAATAGGCAGACAGACTT     | 6FAM-CTGAGAGACTCTAAATCCAGT  |
| Trad      | TCR delta       | γδ T Cells             | CCGAGAAGGTGAACATGATGTC    | CAGTCTTTGCAACAGCATTCG       | 6FAM-TCACAGTCTGTGGGC        |
| Ubc       | Ubiquitin C     | Housekeeping           | CACCTGGTCTGCGCTTGA        | AGTGAATGAAATTTGTTGAAACC     | 6FAM-TGCTAAGTTTCCCCTTTTA    |
| Ubd       | Ubiquitin D     | Inflammation           | TGCCGTAATCTGCCATCATC      | CCAGATTGTGACTTGCATGGA       | 6FAM-TCCCCTCTCCAGTCTC       |
| Ywhaz     | Monoxygenase    | Housekeeping           | TGAAAAAGGCCCGCATGAT       | TGGGATGCAAGCAAAGGAA         | 6FAM-TTTCTGGCTCCACTCAG      |

## References Supplemental Methods

1. Allaire NE, Rieder LE, Bienkowska J, Carulli JP. (2008) Experimental comparison and cross-validation of Affymetrix HT plate and cartridge array gene expression platforms. *Genomics* 92:359-65
2. Allaire, NE., Bienkowska, J., Brock, G., Carulli, J. (2013) Optimization of a high-throughput whole blood expression profiling methodology and its application to assess the pharmacodynamics of interferon (IFN) beta-1a or polyethylene glycol-conjugated IFN beta-1a in healthy clinical trial subjects. *BMC Res Notes* 6, 8
3. Vallittu A-M, Eralinna J-P, Ilonen J, Salmi AA and Waris M. (2007) MxA protein assay for optimal monitoring of IFN-beta bioactivity in the treatment of MS patients. *Acta Neurol Scand* 118, 1-17
4. Da Silva, A. J., M. Brickelmaier, G. R. Majeau, A. V. Lukashin, J. Peyman, A. Whitty, and P. S. Hochman. (2002) Comparison of gene expression patterns induced by treatment of human umbilical vein endothelial cells with IFN-alpha 2b vs. IFN-beta 1a: understanding the functional relationship between distinct type I interferons that act through a common receptor. *J Interferon Cytokine Res* 22: 173-188

# Supplemental Methods Continued:

## RA202 Investigators

| Study Number | Country            | Investigator                     | Institution and IRB                                          | Site Address                                                                   | City            | State |
|--------------|--------------------|----------------------------------|--------------------------------------------------------------|--------------------------------------------------------------------------------|-----------------|-------|
| 104RA202     | ARGENTINA          | Eimon, Alicia                    | CEMIC                                                        | Galvan 4102                                                                    | Buenos Aires    |       |
| 104RA202     | ARGENTINA          | Venarotti, Horacio               | Atencion Integral en Reumatologia                            | Av Cabildo 1131                                                                | Buenos Aires    |       |
| 104RA202     | ARGENTINA          | Martins, Silvia                  | Hospital Espanol                                             | Belgrano 2975                                                                  | Buenos Aires    |       |
| 104RA202     | ARGENTINA          | Spindler, Alberto                | Centro Medico Privado de Reumatologia                        | Lavalle 506                                                                    | Tucuman         |       |
| 104RA202     | ARGENTINA          | Tate, Guillermo                  | Organizacion Medica de Investigacion (OMI)                   | Uruguay 725 PB                                                                 | Buenos Aires    |       |
| 104RA202     | ARGENTINA          | Velasco, Jorge                   | CER Instituto Medico                                         | Vicente Lopez 1441                                                             | Quilmes         |       |
| 104RA202     | ARGENTINA          | Lazaro, Alicia                   | CIDEA                                                        | Paraquay 2035 2 Sub 3 Cuerpo                                                   | Buenos Aires    |       |
| 104RA202     | ARGENTINA          | Alvarellos, Alejandro            | Hospital Privado S.A.                                        | Av. Naciones Unidas 346 3piso                                                  | Cordoba         |       |
| 104RA202     | ARGENTINA          | Zoruba, Diana                    | Grupo Medico Lomes de San Isidro                             | Monsenor Magilano 3041                                                         | San Isidro      |       |
| 104RA202     | BRAZIL             | Silva, Marilia                   | HEC -Hospital Evangelico de Curitiba                         | Alameda Augusto Steffell 2034                                                  | Curitiba        |       |
| 104RA202     | BRAZIL             | Zerbini, Cristiano               | Hospital Heliopolis                                          | Unidade de Gestao Assistencial Av Almirante de la Mare                         | Sao Paulo       |       |
| 104RA202     | BRAZIL             | Azevedo, Mario Newton            | Universidade Federal do Rio de Janeiro - Hospital Universita | Departamento de Reumatologia Av. Rodolfo Rocco.                                | Rio de Janeiro  |       |
| 104RA202     | BRAZIL             | Keiserman, Mauro                 | Hospital Sao Lucas da PUCRS                                  | Uniao Brasileira de Educacao Av. Ipiranga 6690                                 | Porto Alegre    |       |
| 104RA202     | BRAZIL             | Brenol, Joao Carlos              | Hospital de Clinicas de Porto Alegre                         | Rua Ramiro Barcelos, 2350                                                      | Porto Alegre    |       |
| 104RA202     | BRAZIL             | Levy, Roger                      | Centro de Ensino e Pesquisas do Pro Cardiao - PROCEP         | Departamento de Pesquisa Rua General Polidoro, 192                             | Rio de Janeiro  |       |
| 104RA202     | BRAZIL             | Lage, Lais Verderame             | Fundacao Faculdade de Medicina                               | Avenida Doutor Arnaldo n455                                                    | Sao Paulo       |       |
| 104RA202     | BRAZIL             | Rademinski, Sebastiao            | Hospital de Clinicas da Universidade Federal do Parana       | Centro de Estudos em Terapias 1 Centro de Estudos em Terapias Inovadoras- CETI | Curitiba        |       |
| 104RA202     | BRAZIL             | Pollak, Daniel Feldman           | Instituto Paulista de Reumatologica                          | Rua Dr. Baccelar, 208                                                          | Sao Paulo       |       |
| 104RA202     | BRAZIL             | Scheimberg, Morton               | Hospital Abreu Sodre                                         | Associacao de Assistencia a Cr Avenida Professor Ascendino Reis                | Sao Paulo       |       |
| 104RA202     | BRAZIL             | Ximenes, Antonio Carlos          | Hospital Geral de Goiania                                    | Pesquisa Clinica/Reumatolo Av. Anhanguera                                      | Goiania         |       |
| 104RA202     | HUNGARY            | Szekanecz, Zoltan                | University of Debrecen                                       | 3rd Clinic - Internal Medicine Moricz Zs. krt 22                               | Debrecen        |       |
| 104RA202     | HUNGARY            | Geher, Pal                       | Polyclinic of the Hospitaler Brothers of St John of God      | 2nd Department of Rheumatology Frankel Leo ut 17-19                            | Budapest        |       |
| 104RA202     | HUNGARY            | Ferinicz, Vera                   | Zala Megyei Korhaz                                           | Department Of Neurology Zrinyi u. 1.                                           | Zalaegerszeg    |       |
| 104RA202     | HUNGARY            | Szombati, Istvan                 | Diagnostic Units Hungary                                     | SMO Becsi ut 61                                                                | Budapest        |       |
| 104RA202     | HUNGARY            | Gyogy Kiss, Csaba                | Peci Tudomanyegyetem                                         | Department of Rheumatology Rheumatologiai es Immunologiai                      | Pecs            |       |
| 104RA202     | HUNGARY            | Keszthelyi, Peter                | Pandy Kalman County Hospital                                 | Rheumatology Semmelweis u. 1                                                   | Gyula           |       |
| 104RA202     | HUNGARY            | Toth, Edit                       | Flor Ferenc County Hospital                                  | Reumatology Semmelweis ter 1.                                                  | Kistarcsa       |       |
| 104RA202     | HUNGARY            | Rojkovich, Bernadette            | Budai Irgalmasrendi Korhaz                                   | 1 szamu Reumatologiai Osztaly Frankel Leo ut 33                                | Budapest        |       |
| 104RA202     | HUNGARY            | Ujfalussy, Iona                  | Allami Egsegseguyi Kozpont                                   | Reumatologiai Osztaly Podmaniczky u. 109-111                                   | Budapest        |       |
| 104RA202     | MEXICO             | Sanchez, Jorge Guerrero          | Instituto Nacional de Ciencias                               | Medicas Y Nutricion "Dr Salvad Vasco de Quiroga 15                             | Mexico City     |       |
| 104RA202     | MEXICO             | Xibille, Daniel Xavier Friedmann | Hospital Inovamed                                            | Administradora de Clinicas, SA Calle Guauhtemoc #203-109                       | Cuernavaca      |       |
| 104RA202     | MEXICO             | Cons, Francisco Fidencio Molina  | OSTEO MED, SC                                                | Clinica de Artritis y Osteopor Alvaro Obregon 1257-1                           | Mexicali        |       |
| 104RA202     | MEXICO             | Villarreal, Arturo Anselmo Rios  | Hospital y Clinica OCA                                       | S.A. de C.V. Pablo A. Gonzalez 709                                             | Monterrey       |       |
| 104RA202     | MEXICO             | Abud, Carlos Mendoza             | Hospital Central "Dr. Ignacio Morones Prieto"                | Departamento de Reumatologia Av. Venustiano Carranza 2395                      | San Luis Potosi |       |
| 104RA202     | POLAND             | Filipowicz-Sosnowska, Anna       | Instytut Reumatologiczny                                     | Klinika Reumatologii ul. Spartanska 1                                          | Warsaw          |       |
| 104RA202     | POLAND             | Jeka, Slawomir                   | Szpital Uniwersytecki nr 2 im.dr J. Bizia                    | Praktyka Lekarza Rodzinnego Na ul. Szczcyna 20                                 | Bydgoszcz       |       |
| 104RA202     | POLAND             | Dudek, Anna                      | Centrum Leczenia Chorob Cywilizacyjnych                      | Al. Komisji                                                                    | Warsaw          |       |
| 104RA202     | POLAND             | Szczepanski, Leszek              | Osrodek Badan Klinicznych                                    | ul. Kruczka 5                                                                  | Lublin          |       |
| 104RA202     | POLAND             | Leszczynski, Piotr               | Indywidualna Specjalistyczna Praktyka Lekarska               | Piotr Leszczynski ul. Hetmanska 55/1                                           | Poznan          |       |
| 104RA202     | POLAND             | Chudzik, Dariusz                 | Niepubliczny Zaklad Opieki Zdrowotnej (NZOZ) reumed          | Department of Rheumatology ul. Konrada Wollneroda 25/4                         | Lublin          |       |
| 104RA202     | POLAND             | Pokrzywnicka-Gajek, Ines         | Centrum Medyczne Osteomed sp. z o.o.                         | ul. Al. Krakowska 110/114                                                      | Warsaw          |       |
| 104RA202     | POLAND             | Jeka, Slawomir                   | Oddzial Reumatologii z Poddzialaniem Rehabilitacji           | Szpital Wojewodzki im. Dr J. B ul. Ujejskiego 75                               | Bydgoszcz       |       |
| 104RA202     | ROMANIA            | Udrea, Gabriela                  | Dr. I. Cantanuzino Hospital                                  | Clinic of Intrenal Medicine an 5-7 Ion Movila Street                           | Bucharest       |       |
| 104RA202     | ROMANIA            | Cristel, Dorcia                  | Promedica Policlinic                                         | Rheumatology Clinic 2 Independentei Street                                     | Braila          |       |
| 104RA202     | ROMANIA            | Bolosiu, Horatiu                 | Emergency Clinical County Hospital Cluj                      | Rheumatology Clinic 2-4 Clinicilor Street                                      | Cuji Napoca     |       |
| 104RA202     | ROMANIA            | Pavel, Mariana                   | Emergency Hospital "St Apostol Andrei" Galati                | 177 Brailie Street                                                             | Galati          |       |
| 104RA202     | ROMANIA            | Rezus, Elena                     | Investigati Medicale Praxis                                  | 33 Independentei Blvd                                                          | Iasi            |       |
| 104RA202     | ROMANIA            | Codreanu, Catalin                | Prof.Dr.Ion Stoia Centre of Rheumatic Diseases               | 5 Thomas Masaryk Street                                                        | Bucharest       |       |
| 104RA202     | ROMANIA            | Chices, Liliana                  | Clinical County Hospital Sibiu                               | 2-4 Corneliu Coposu Blvd                                                       | Sibiu           |       |
| 104RA202     | ROMANIA            | Mociran, Eugenia                 | Emergency Clinical County Hospital Bala-Mare                 | 31 George Cosbuc Street                                                        | Bala Mare       |       |
| 104RA202     | ROMANIA            | Ianuli, Adelina                  | Ianuli MedConsult                                            | 50 Nicolae Filipescu Street                                                    | Bucharest       |       |
| 104RA202     | RUSSIAN FEDERATION | Barbarash, Olga                  | Kemerovo Regional Clinical Hospital                          | Cardio-Rheumatology Department State Institution of Healthcare                 | Kemerovo        |       |
| 104RA202     | RUSSIAN FEDERATION | Chernykh, Tatiana Nikolovna      | Voronezh Regional Clinical Hospital #1                       | Rheumatology Department 151, Moskovskiy prospect                               | Voronezh        |       |
| 104RA202     | RUSSIAN FEDERATION | Glasunov, Alexandr Vladimirovich | City Clinical Hospital #81                                   | Chair of therapy on the case o 10, Ulitsa Lobninskaya                          | Moscow          |       |
| 104RA202     | RUSSIAN FEDERATION | Konenkova, Ludmila Petrovna      | Scientific Institute of Clinical Immunology of Siberia       | Rheumatology Department 14, Ulitsa Yadrintsovskaya                             | Novosibirsk     |       |
| 104RA202     | RUSSIAN FEDERATION | Stetsiouk, Olga Ulyanovna        | Smolensk State Medical Academy of Roszdov                    | Center of Clinical Trials and 28 Ulitsa Krasnaya                               | Smolensk        |       |
| 104RA202     | RUSSIAN FEDERATION | Nasonov, Evengy Lvovich          | Russian Academy of Medical Sciences                          | Institute of Rheumatology 34a Kashirskoe shosse                                | Moscow          |       |
| 104RA202     | RUSSIAN FEDERATION | Shmiti, Eugeniya Isakovna        | Moscow City Clinical Hospital #1                             | Rheumatology Department 10, Building 8                                         | Moscow          |       |
| 104RA202     | RUSSIAN FEDERATION | Yekushin, Sergey Stepanovich     | Ryazan Regional Clinical Cardiological Dispensary            | Cardiology Department 96 Ulitsa Stroikova                                      | Rjazan          |       |

## Supplemental Methods Continued:

| Study Number | Country            | Investigator          | Institution and IRB                                         | Site Address                                             | City                | State          |
|--------------|--------------------|-----------------------|-------------------------------------------------------------|----------------------------------------------------------|---------------------|----------------|
| 104RA202     | RUSSIAN FEDERATION | Nikulenkov, Natalya   | Vladimir State Regional Clinical Hospital                   | Rheumatology Department 41<br>Sudogodskoe shosse         | Vladimir            |                |
| 104RA202     | RUSSIAN FEDERATION | Mazurov, Vadim        | Saint Petersburg Medical Academy of<br>Postgraduate Studies | Department of Therapy N1 (Rheu 41,<br>Kirochnaya Street  | Saint Petersburg    |                |
| 104RA202     | RUSSIAN FEDERATION | Sokolova, Ludmila     | St. Petersburg State Healthcare: City<br>Polyclinic 40      | Department of Therapy 1st Floor                          | Saint Petersburg    |                |
| 104RA202     | RUSSIAN FEDERATION | Sorotskaya, Valentina | Tula Regional Hospital                                      | Ulitsa Yablochkova, 1 a                                  | Tula                |                |
| 104RA202     | RUSSIAN FEDERATION | Uspenskiy, Yuriy      | St Petersburg State Medical Academy                         | Named after I I Mechnikov                                | St. Petersburg      |                |
| 104RA202     | RUSSIAN FEDERATION | Sokolova, Vera        | North West Regional Medical Center of<br>Roszdrazv          | Rheumatology Department Kodetskaya<br>Liniya, 13-15      | St. Petersburg      |                |
| 104RA202     | UNITED KINGDOM     | Emery, Paul           | Chapel Allerton Hospital                                    | Academic Unit Of Muscular Dise 2nd<br>Floor              | Leeds               | West Yorkshire |
| 104RA202     | UNITED KINGDOM     | George, Emmanuel      | Arrowe Park Hospital                                        | Rheumatology Dept Arrowe Park Road                       | Wirral              | Cheshire       |
| 104RA202     | UNITED KINGDOM     | Mckenna, Frank        | Trafford General Hospital                                   | Rheumatology Department Davyhulme                        | Manchester          |                |
| 104RA202     | UNITED KINGDOM     | Isaacs, John          | University of Newcastle upon Tyne                           | Department of Rheumatology 4th Floor<br>Cookson Building | Newcastle upon Tyne |                |
| 104RA202     | UNITED KINGDOM     | Scott, David          | King's College Hospital                                     | Clinical and Academic Rheumato<br>Denmark Hill           | London              |                |

## Supplemental Methods Continued:

### RA203 Investigators

| Study Number | Country        | Investigator                 | Institution and IRB                                    | Site Address                                                                          | City                | State                     |
|--------------|----------------|------------------------------|--------------------------------------------------------|---------------------------------------------------------------------------------------|---------------------|---------------------------|
| 104RA203     | BELGIUM        | Malaise, Michel              | Centre Hospitalier Universitaire                       | Department of Rheumatology Domaine Universitaire du Sart Tilman                       | Liege               |                           |
| 104RA203     | BELGIUM        | Willame, Lucas               | Academisch Ziekenhuis Middelheim                       | Lindendreef 1                                                                         | Antwerp             |                           |
| 104RA203     | BELGIUM        | Durez, P                     | University Hospital Erasme                             | Department of Neurology Route de Lennik 808                                           | Brussels            |                           |
| 104RA203     | CANADA         | Chow, Andrew                 | Credit Valley Hospital                                 | 2300 Eglinton Avenue West                                                             | Mississauga         | Ontario                   |
| 104RA203     | CANADA         | Grant, Eric                  | St. John Regional Hospital                             | Department of Medicine 400 University Avenue                                          | St. John            | New Brunswick             |
| 104RA203     | CANADA         | Khraisni, Majed              | St. Claire's Mercy Hospital                            | Le Merchant Road                                                                      | St. John's          | Newfoundland and Labrador |
| 104RA203     | CANADA         | Russell, Anthony             | University of Alberta                                  | Rheumatic Disease Unit 562 Heritage Building                                          | Edmonton            | Alberta                   |
| 104RA203     | CANADA         | Thorne, Carter               | The Arthritis Program Research Group, Inc.             | 43 Lundy's Lane                                                                       | Newmarket           | Ontario                   |
| 104RA203     | CANADA         | Rodrigues, Jude              | Clinical Research & Arthritis Centre                   | 1720 Howard Avenue                                                                    | Windsor             | Ontario                   |
| 104RA203     | CANADA         | McCarthy, Timothy            | Manitoba Clinic                                        | 790 Sherbrook Street                                                                  | Winnipeg            | Manitoba                  |
| 104RA203     | UNITED KINGDOM | Emery, Paul                  | Leeds University                                       | Department of Rheumatology Research Unit                                              | Leeds               |                           |
| 104RA203     | UNITED KINGDOM | Mckenna, Frank               | Trafford General Hospital                              | Rheumatology Department Davy Hulme                                                    | Manchester          |                           |
| 104RA203     | UNITED KINGDOM | Isaacs, John                 | University of Newcastle upon Tyne                      | Department of Rheumatology 4th Floor Cookson Building                                 | Newcastle upon Tyne |                           |
| 104RA203     | UNITED KINGDOM | Scott, David                 | King's College Hospital                                | Clinical and Academic Rheumatology Denmark Hill                                       | London              |                           |
| 104RA203     | UNITED KINGDOM | Sheeran, Tom                 | Cannock Chase Hospital                                 | Dept. of Rheumatology Brunswick Road                                                  | Cannock             |                           |
| 104RA203     | UNITED KINGDOM | Chattopadhyay, Chandrabhusan | Wrightington Hospital                                  | Clinical Trials Department Hall Lane                                                  | Wigan               |                           |
| 104RA203     | UNITED STATES  | Baldassare, Andrew           | Arthritis Consultants                                  | 522 N. Ballas Road                                                                    | St. Louis           | Missouri                  |
| 104RA203     | UNITED STATES  | Fiechter, Justus             | Fiechter Research Inc.                                 | 3394 E. Jolly Road                                                                    | Lansing             | Michigan                  |
| 104RA203     | UNITED STATES  | Alloway, Jeff                | Physicians East, PA                                    | 2780-D Dickson Avenue                                                                 | Greenville          | North Carolina            |
| 104RA203     | UNITED STATES  | Busch, Howard                | Family Arthritis Center                                | 1025 Military Trail                                                                   | Jupiter             | Florida                   |
| 104RA203     | UNITED STATES  | Caldron, Paul                | Arizona Arthritis and Rheumatology Associates, PLLC    | 10599 North Tatum Blvd.                                                               | Paradise Valley     | Arizona                   |
| 104RA203     | UNITED STATES  | Chubick, Andrew              | Arthritis Center of Texas                              | 712 N. Washington Ave.                                                                | Dallas              | Texas                     |
| 104RA203     | UNITED STATES  | Coddling, Christine          | Health Research of Oklahoma                            | 1211 N. Shartel                                                                       | Oklahoma City       | Oklahoma                  |
| 104RA203     | UNITED STATES  | Cohen, Stanley               | Metroplex Clinical Research Center                     | 8144 Walnut Hill Lane                                                                 | Dallas              | Texas                     |
| 104RA203     | UNITED STATES  | Furie, Richard               | NJ-LJ Health Systems                                   | Division of Rheumatology & All Division of Rheumatology & Allergy-Clinical Immunology | Lake Success        | New York                  |
| 104RA203     | UNITED STATES  | Gaylis, Norman               | Arthritis and Rheumatic Disease Specialties            | 2845 Aventura Boulevard                                                               | Aventura            | Florida                   |
| 104RA203     | UNITED STATES  | Genovese, Mark               | Stanford University                                    | Medical Center, Rheumatology                                                          | Palo Alto           | California                |
| 104RA203     | UNITED STATES  | Greenwald, Maria             | Osteoporosis Medical Center                            | 39700 Bob Hope Drive                                                                  | Rancho Mirage       | California                |
| 104RA203     | UNITED STATES  | Kremer, Joel                 | The Center for Rheumatology                            | 1367 Washington Avenue                                                                | Albany              | New York                  |
| 104RA203     | UNITED STATES  | Luggen, Michael              | Cincinnati Rheumatic Disease Study Group               | 311 Straight Street                                                                   | Cincinnati          | Ohio                      |
| 104RA203     | UNITED STATES  | Mease, Phillip               | Seattle Rheumatology Associates                        | 1101 Madison Street                                                                   | Seattle             | Washington                |
| 104RA203     | UNITED STATES  | Rigby, William               | Dartmouth Hitchcock Medical Center                     | One Medical Center Drive                                                              | Lebanon             | New Hampshire             |
| 104RA203     | UNITED STATES  | Ruderman, Eric               | Northwestern University                                | Division of Rheumatology                                                              | Chicago             | Illinois                  |
| 104RA203     | UNITED STATES  | Shergy, William              | Rheumatology Associates                                | 201 Sibley Road                                                                       | Huntsville          | Alabama                   |
| 104RA203     | UNITED STATES  | Fife, Rose                   | Indiana University                                     | School of Medicine Outpatient Clinical Research Facility                              | Indianapolis        | Indiana                   |
| 104RA203     | UNITED STATES  | Saadah, Constantine          | Amarillo Center for Clinical Research                  | 6842 Plum Creek Dr.                                                                   | Amarillo            | Texas                     |
| 104RA203     | UNITED STATES  | Kavanaugh, Arthur            | University of California, San Diego                    | Division of Rheumatology 9320 Campus Point Drive                                      | La Jolla            | California                |
| 104RA203     | UNITED STATES  | Dao, Kathryn                 | Texas Health Research and Education Institute          | 9301 N. Central Expressway                                                            | Dallas              | Texas                     |
| 104RA203     | UNITED STATES  | Murphy, Frederick            | Altoona Osteoarthritis and Rheumatoid Arthritis Center | 175 Meadowbrook Lane                                                                  | Duncansville        | Pennsylvania              |
| 104RA203     | UNITED STATES  | Berney, Seth                 | LSU Health Science Center                              | Center for Excellence for Arth 1501 Kings Highway                                     | Shreveport          | Louisiana                 |
| 104RA203     | UNITED STATES  | Wolfe, Sanford               | Stat Research                                          | One Elizabeth Place                                                                   | Dayton              | Ohio                      |
| 104RA203     | UNITED STATES  | Warrick, Jay                 | Rheumatology Consultants                               | 4707 Papermill Drive                                                                  | Knobville           | Tennessee                 |
| 104RA203     | UNITED STATES  | Birbara, Charles             | Clinical Pharmacology Study Group                      | 26 Queen Street                                                                       | Worcester           | Massachusetts             |
| 104RA203     | UNITED STATES  | Forstot, Joseph              | RASF Clinical Research Center                          | 1050 NW 15th Street                                                                   | Boca Raton          | Florida                   |
| 104RA203     | UNITED STATES  | Freeman, Pamela              | Rheumatology Associates of Central Florida             | 3160 Southgate Commerce Blvd.                                                         | Orlando             | Florida                   |
| 104RA203     | UNITED STATES  | Wei, Nathan                  | Arthritis & Osteoporosis Center of Maryland            | 71 Thomas Johnson Drive                                                               | Frederick           | Maryland                  |
| 104RA203     | UNITED STATES  | Lies, Richard                | Wichita Clinic                                         | 3311 E. Murdock                                                                       | Wichita             | Kansas                    |
| 104RA203     | UNITED STATES  | Kolba, Karen                 | Pacific Arthritis Center Medical Group                 | 607 E. Plaza Dr.                                                                      | Santa Maria         | California                |
| 104RA203     | UNITED STATES  | Schechtman, Joy              | Sun Valley Arthritis Center, Ltd.                      | 6818 W. Thunderbird Rd.                                                               | Peoria              | Arizona                   |
| 104RA203     | UNITED STATES  | Chase, Walter                | Capital Medical Clinic                                 | 1301 West 38th Street                                                                 | Austin              | Texas                     |
| 104RA203     | UNITED STATES  | Roschmann, Robert            | Rheumatology, PC                                       | 2490 S. 11th Street                                                                   | Kalamazoo           | Michigan                  |
| 104RA203     | UNITED STATES  | Hou, Antony                  | Boling Clinical Trials                                 | 510 N. 13th Avenue                                                                    | Upland              | California                |
| 104RA203     | UNITED STATES  | Weitz, Michael               | Center for Arthritis and Rheumatic Diseases            | 6150 Sunset Drive                                                                     | South Miami         | Florida                   |
| 104RA203     | UNITED STATES  | Minter, Michael              | Quad City Rheumatology, S.C.                           | 4362 - 7th Street                                                                     | Moline              | Illinois                  |
| 104RA203     | UNITED STATES  | Wellborne, Frank             | Houston Institute for Clinical Research                | 7777 Southwest Freeway                                                                | Houston             | Texas                     |
| 104RA203     | UNITED STATES  | Sherrer, Yvonne              | Center for Rheumatology Immunology and Arthritis       | 5333 North Dixie Highway                                                              | Fort Lauderdale     | Florida                   |
| 104RA203     | UNITED STATES  | Johnson, David               | Bluegrass Internal Medicine                            | 1000 Breckenridge Street                                                              | Owensboro           | Kentucky                  |

## Supplemental Table 1:

Demographics of the Patients in the RA Studies and the SLE Registry

| Clinical Characteristics of RA Study Patients |              |              |              |              |              |              |               |                |
|-----------------------------------------------|--------------|--------------|--------------|--------------|--------------|--------------|---------------|----------------|
| Variable                                      | TNF-IR*      |              | DMARD-IR     |              |              |              |               |                |
|                                               | Placebo      | 200 mg eow   | Placebo      | 5 mg eow     | 70 mg eow    | 200 mg eow   | 70 mg monthly | 200 mg monthly |
| n                                             | 38           | 76           | 79           | 78           | 78           | 78           | 39            | 39             |
| age years, mean (range)                       | 54.3 (30-74) | 53.6 (24-74) | 52.3 (23-72) | 50.3 (19-77) | 49.9 (25-75) | 49.9 (27-71) | 51.9 (23-73)  | 48.1 (25-72)   |
| % white                                       | 82           | 83           | 94           | 86           | 85           | 86           | 92            | 85             |
| % female                                      | 82           | 80           | 86           | 86           | 86           | 85           | 87            | 90             |
| Disease Duration years                        | 9.3 (7.7)    | 12.9 (10.5)  | 7.2 (8.3)    | 7.8 (7.1)    | 7.3 (6.2)    | 8.3 (7.7)    | 8.4 (6.2)     | 6.3 (6.2)      |
| SJC28                                         | 11.5 (6.2)   | 11.6 (6.5)   | 11.5 (6.1)   | 12.8 (5.0)   | 12.9 (5.6)   | 11.5 (4.9)   | 12.9 (5.0)    | 13.5 (5.7)     |
| TJC28                                         | 14.6 (7.0)   | 15.2 (8.0)   | 17.5 (7.1)   | 17.3 (4.9)   | 20.0 (5.6)   | 14.6 (6.2)   | 17.8 (6.8)    | 17.4 (6.2)     |
| CRP mg/liter                                  | 1.85 (1.6)   | 1.7 (2.2)    | 1.9 (2.7)    | 2.3 (2.2)    | 1.8 (2.2)    | 1.9 (2.2)    | 1.7 (1.4)     | 1.9 (1.9)      |
| ESR mm/hr                                     | 42.0 (23.9)  | 45.1 (26.3)  | 48.9 (25.4)  | 58.3 (31.2)  | 55.5 (27.0)  | 48.8 (23.4)  | 51.6 (26.5)   | 49.3 (29.7)    |
| DAS28 ESR                                     | 6.4 (1.1)    | 6.4(1.1)     | 6.7 (0.8)    | 6.8 (0.9)    | 6.9 (0.7)    | 6.6 (0.7)    | 6.8 (0.8)     | 6.7 (0.9)      |
| HAQ-DI                                        | 1.5 (0.7)    | 1.6 (0.6)    | 1.6 (0.5)    | 1.6 (0.5)    | 1.5 (0.6)    | 1.7 (0.6)    | 1.6 (0.6)     | 1.6 (0.7)      |
| Rf % Positive                                 | 63           | 61           | 78           | 77           | 82           | 81           | 74            | 87             |
| Anti-CCP % Positive                           | 66           | 66           | 80           | 79           | 79           | 81           | 79            | 82             |

\*This study was terminated slightly early due to lack of efficacy in the DMARD-IR study. Of the 114 patients enrolled, 81 completed the full 14 weeks of dosing. Unless noted, mean and SD

| Clinical Characteristics of SLE Study Patients |           |
|------------------------------------------------|-----------|
| <b>Variable</b>                                |           |
| n                                              | 292       |
| age, mean (s)                                  | 46 (11.9) |
| % Female                                       | 91.1      |
| <b>Ethnic Origin</b>                           |           |
| African-Am                                     | 33.90%    |
| Caucasian                                      | 58.90%    |
| Other                                          | 7.20%     |
| SLEDAI $\geq$ 2                                | 29%       |
| Anti-DNA $\geq$ 1i                             | 22%       |
| C3 > 79                                        | 11%       |
| C4 < 12                                        | 10%       |
| Proteinuria >                                  | 11%       |

## Supplemental Table 2

### Measurement of IFN signatures

a). Genes used to form the Interferon transcriptional signature scores. The 8 gene IFN signature was a subset of the genes defined by Waddell et al (1) and exhibited internal correlation within these datasets. The 2 gene GBP1/2 signature was described by Rose et al (2). Asterisk indicates two or more separate primers.

| Interferon<br>15 Gene<br>Affymetrix | Interferon<br>3 gene qPCR | Interferon-gamma<br>8 gene Affymetrix | Interferon-<br>gamma<br>2 gene<br>Affymetrix |
|-------------------------------------|---------------------------|---------------------------------------|----------------------------------------------|
| BATF2                               | ISG15                     | ASPH                                  | GBP1*                                        |
| DDX58                               | OAS1                      | CEBPA                                 | GBP2                                         |
| HERC5                               | Ly6E                      | CIITA                                 |                                              |
| IFI6                                |                           | CLEC10A                               |                                              |
| IFI44L                              |                           | FCGR1A                                |                                              |
| IFIT3                               |                           | IL6R                                  |                                              |
| IFI44                               |                           | LIMK2                                 |                                              |
| ISG15                               |                           | SLC1A5                                |                                              |
| LIPA                                |                           |                                       |                                              |
| MX1                                 |                           |                                       |                                              |
| OAS1                                |                           |                                       |                                              |
| OAS3                                |                           |                                       |                                              |
| RSAD2 *                             |                           |                                       |                                              |
| TIMM10                              |                           |                                       |                                              |
| UBE2L6                              |                           |                                       |                                              |

- 1). Waddell, S. J., S. J. Popper, K. H. Rubins, M. J. Griffiths, P. O. Brown, M. Levin, and D. A. Relman. 2010. Dissecting interferon-induced transcriptional programs in human peripheral blood cells. *PLoS One* 5: e9753.
- 2). Hall, J. C., L. Casciola-Rosen, A. E. Berger, E. K. Kapsogeorgou, C. Cheadle, A. G. Tzioufas, A. N. Baer, and A. Rosen. 2012. Precise probes of type II interferon activity define the origin of interferon signatures in target tissues in rheumatic diseases. *Proc Natl Acad Sci U S A* 109: 17609-17614.

**Supplemental Table 3:**

| <b>Incidence of adverse Events by Preferred Term<br/>for the combined Placebo-Controlled Studies</b> |                |                    |
|------------------------------------------------------------------------------------------------------|----------------|--------------------|
| <b>Variable</b>                                                                                      | <b>Placebo</b> | <b>Baminercept</b> |
| number of subjects dosed                                                                             | 117 (100)      | 388 (100)          |
| Events                                                                                               | 67 (57)        | 234 (60)           |
| Rheumatoid Arthritis                                                                                 | 21 (18)        | 35 (9)             |
| Headache                                                                                             | 8 (7)          | 27 (7)             |
| URTI                                                                                                 | 2 (2)          | 23 (6)             |
| Nausea                                                                                               | 7 (6)          | 19 (5)             |
| Cough                                                                                                | 5 (4)          | 18 (5)             |
| Pyrexia                                                                                              | 0 (0)          | 17 (4)             |
| Influenza                                                                                            | 2 (2)          | 16 (4)             |
| Myalgia                                                                                              | 3 (3)          | 14 (4)             |
| Nasopharyngitis                                                                                      | 3 (3)          | 14 (4)             |
| Diarrhoea                                                                                            | 6 (5)          | 13 (3)             |
| Injection Site Eryhema                                                                               | 0 (0)          | 12 (3)             |
| Injection Site Pain                                                                                  | 4 (3)          | 12 (3)             |
| Dizziness                                                                                            | 4 (3)          | 10 (3)             |
| RTI                                                                                                  | 2 (2)          | 10 (3)             |
| Chills                                                                                               | 2 (2)          | 9 (2)              |
| Hypertension                                                                                         | 4 (3)          | 9 (2)              |
| Fatigue                                                                                              | 3 (3)          | 8 (2)              |
| Bronchitis                                                                                           | 1 (<1)         | 7 (2)              |
| Injection Site Puritis                                                                               | 1 (<1)         | 7 (2)              |
| Migrane                                                                                              | 2 (2)          | 7 (2)              |
| ALT Increased                                                                                        | 1 (<1)         | 6 (2)              |
| AST Increased                                                                                        | 0 (0)          | 6 (2)              |
| Asthenia                                                                                             | 1 (<1)         | 6 (2)              |
| Dyspepsia                                                                                            | 1 (<1)         | 6 (2)              |
| Vomiting                                                                                             | 0 (0)          | 6 (2)              |
| Arthralgia                                                                                           | 1 (<1)         | 5 (1)              |
| Increased Body Temperature                                                                           | 1 (<1)         | 5 (1)              |
| Leukocytosis                                                                                         | 0 (0)          | 5 (1)              |
| Abdominal Pain Upper                                                                                 | 1 (<1)         | 4 (1)              |
| Back Pain                                                                                            | 0 (0)          | 4 (1)              |
| Gastritis                                                                                            | 1 (<1)         | 4 (1)              |
| Injection Site Haematoma                                                                             | 1 (<1)         | 4 (1)              |
| Injection Site Rash                                                                                  | 0 (0)          | 4 (1)              |
| Insomnia                                                                                             | 1 (<1)         | 4 (1)              |
| Oedema Perripheral                                                                                   | 0 (0)          | 4 (1)              |
| Rash                                                                                                 | 2 (2)          | 4 (1)              |
| Rhinitis                                                                                             | 0 (0)          | 4 (1)              |
| UTI                                                                                                  | 5 (4)          | 4 (1)              |

Numbers in parentheses are percentages.

A subject was counted only once within each preferred term



### Supplemental Table 4:

Lack of an appreciable effect of baminercept treatment on ACR scores as assessed at 14 weeks.

| Table 3: Clinical ACR Responses at 14 Weeks |              |       |       |        |        |        |
|---------------------------------------------|--------------|-------|-------|--------|--------|--------|
|                                             | DMARD-<br>IR |       |       | TNF-IR |        |        |
|                                             | ACR 20       | ACR50 | ACR70 | ACR 20 | ACR 50 | ACR 70 |
| Placebo                                     | 32           | 11    | 4     | 13     | 5      | 3      |
| 5 mg q2w                                    | 36           | 14    | 4     |        |        |        |
| 70 mg q2w                                   | 40           | 14    | 8     |        |        |        |
| 200 mg q2w                                  | 32           | 12    | 6     | 14     | 11     | 1      |
| 70 mg monthly                               | 36           | 8     | 3     |        |        |        |
| 200 mg monthly                              | 38           | 18    | 10    |        |        |        |

In TNF-IR, numbers included all 114 patients who started dosing and missing data were handled using non-responder imputation methodology. Of these 114 subjects, 81 (71%) completed the entire treatment period with the majority of the discontinuations due to early trial termination. None of the effects of baminercept treatment on ACR scores reached significance, Cochran-Mantel-Haenszet Test.

## Supplemental Figure 1

### Comparison of IFN signatures in RA and SLE

a). Comparison of the baseline numerical 15-gene microarray IFN score in normal, DMARD-IR, TNF-IR and SLE patients.

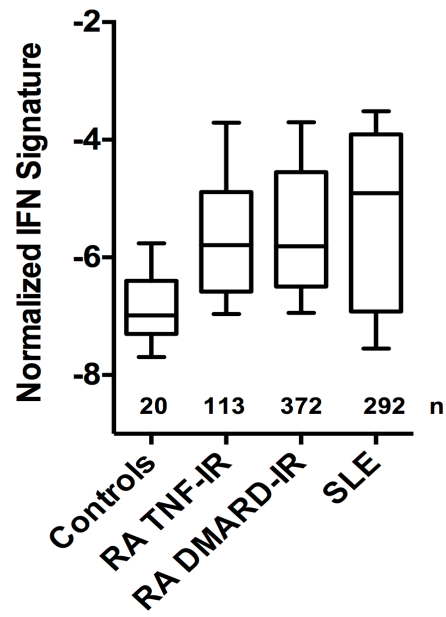

## Supplemental Figure 2:

### Elevation of serum LIGHT levels in RA patients following baminercept treatment

All baminercept doses greater than 5 mg q2w led to a similar elevation of serum LIGHT (Tnfsf14) levels. LIGHT levels were similarly elevated at 6 weeks of treatment (not shown). Prior pilot work had shown that LIGHT levels were elevated about 1.5 fold in most RA patients with a mean of 140 pg/ml in rough agreement with prior published data for arthritis patients (1-2). In our DMARD-IR and TNF-IR studies, the mean values at baseline were slightly lower. Serum levels were determined using a commercial ELISA kit (R&D Systems) where the lower limit of quantitation was 16-30 pg/ml. The assay is complicated by two factors, first, the presence of baminercept partially interferes with LIGHT detection such that the actual values could be as much as 20-30 fold higher. Second, the natural soluble decoy receptor, DcR3, which has been observed in blood from RA patients (3), completely blocks the ability of the ELISA to detect LIGHT (tested using recombinant DcR3-Fc fusion protein, although the bivalent DcR3-Fc may not reflect the presumably monovalent natural form). Baminercept has a much higher affinity for LIGHT and can displace DcR3-Fc from LIGHT thus rendering it detectable by the ELISA. Therefore, the elevation in LIGHT levels could result from both complexation with the baminercept Fc fusion protein and extension of the serum half-life as well as displacement from potential DcR3-LIGHT complexes in circulation at baseline. Box and whiskers show 10-90% range.

- 1). Edwards, J. R., S. G. Sun, R. Locklin, C. M. Shipman, I. E. Adamopoulos, N. A. Athanasou, and A. Sabokbar. 2006. LIGHT (TNFSF14), a novel mediator of bone resorption, is elevated in rheumatoid arthritis. *Arthritis Rheum* 54: 1451-1462.
- 2). Chandran, V., R. J. Cook, J. Edwin, H. Shen, F. J. Pellett, S. Shanmugarajah, C. F. Rosen, and D. D. Gladman. 2010. Soluble biomarkers differentiate patients with psoriatic arthritis from those with psoriasis without arthritis. *Rheumatology (Oxford)* 49: 1399-1405
- 3). Hayashi, S., Y. Miura, K. Tateishi, M. Takahashi, and M. Kurosaka. 2010. Decoy receptor 3 is highly expressed in patients with rheumatoid arthritis. *Mod Rheumatol* 20: 63-68.

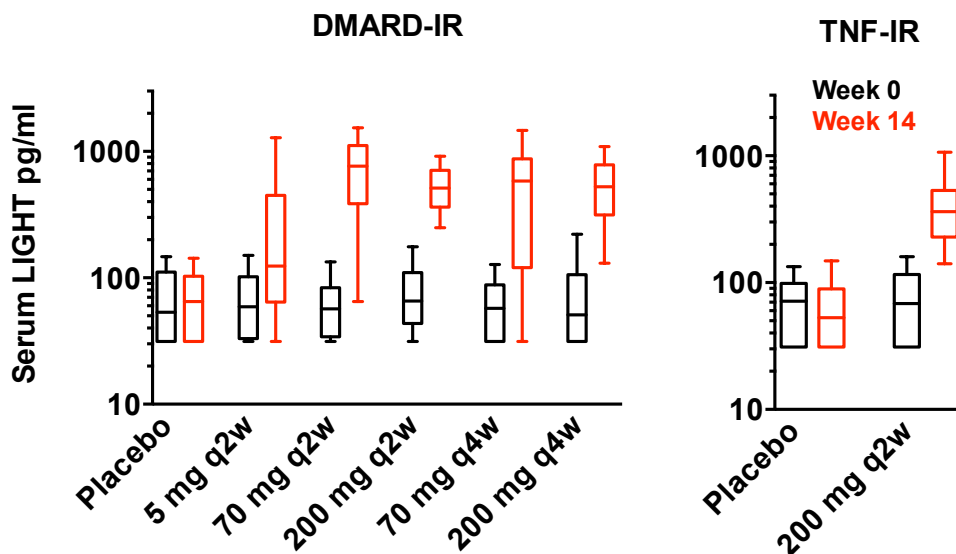

### Supplemental Figure 3:

#### Characteristics of the IFN signatures observed in this study.

a). Lack of correlation between the 15 Gene conventional IFN and the 8 gene type II IFN signatures in RA and SLE patients (Spearman rank  $r$ ). It is not clear if the differences in absolute type II IFN signatures between diseases are due to technical normalization issues.

b). Good correlation between the 15 Gene conventional IFN and a 2 gene (GBP1/2) IFN signature in RA and SLE patients.

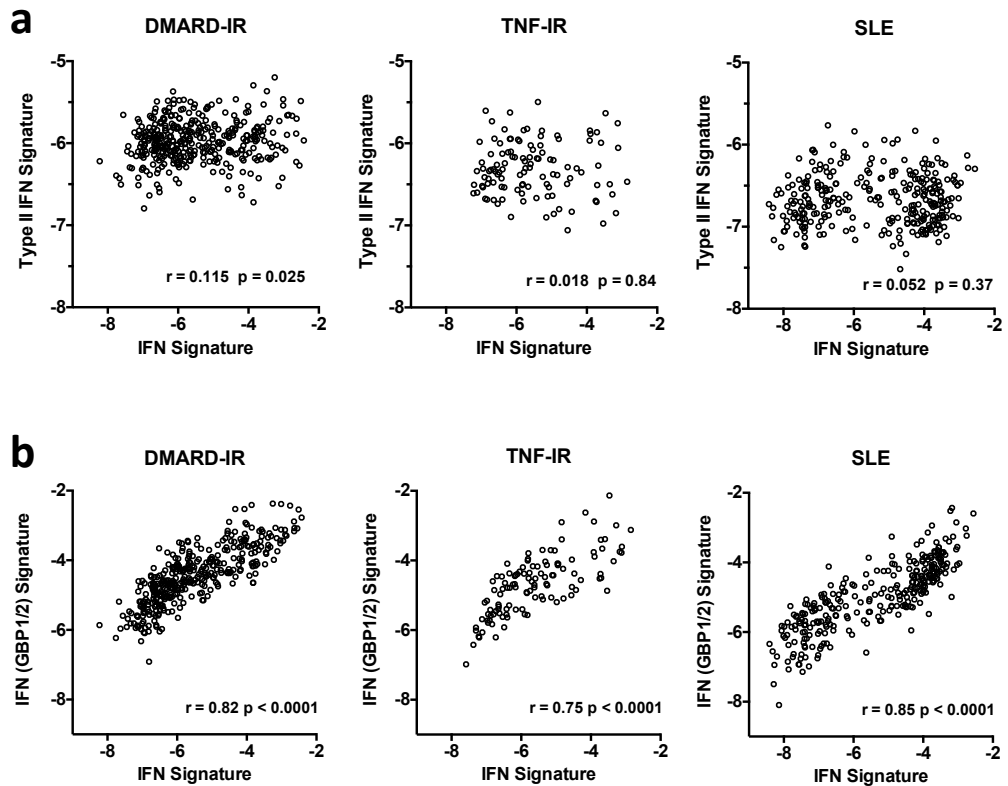

## Supplemental Figure 4:

### Characteristics of baminercept induced lymphocytosis in RA patients

Percent change at week 14 in total white blood cells (WBC), lymphocyte and monocyte numbers increased with baminercept treatment, while neutrophil, basophil and eosinophil counts were relatively unchanged or shifted significantly in only the DMARD-IR study. In the DMARD-IR study, patients treated with 70 or 200 mg q2w were pooled to form the “Bam” group.

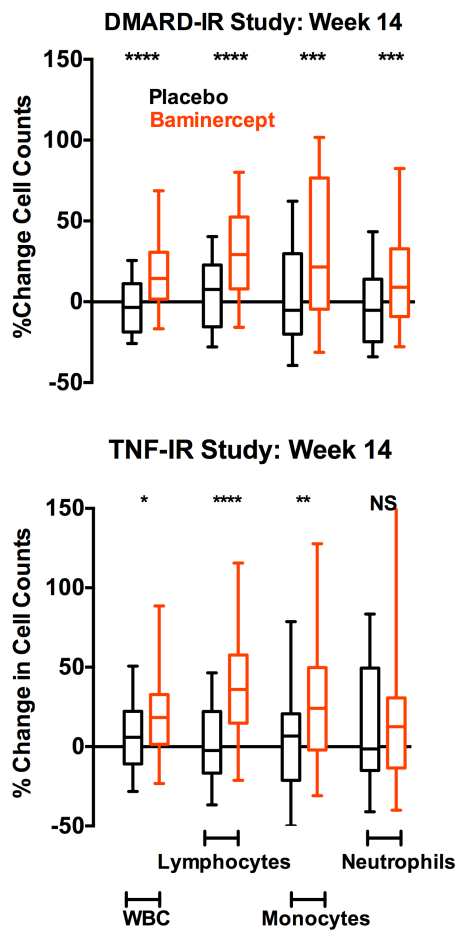

## Supplemental Figure 5:

### Relationship between IFN signature and baminercept treatment on blood neutrophil and monocyte counts

(a). Some decrease in neutrophil counts in IFN signature high patients only in the DMARD-IR study. Baminercept treatment did not appreciably alter the neutrophil counts. Significance was determined with the Mann-Whitney test. In the DMARD-IR study, data from patients treated with 70 or 200 mg q2w were pooled to form the “Bam” group.

(b). Monocyte cell counts were slightly lower in IFN signature high patients in the DMARD-IR group. Baminercept treatment elevated monocyte numbers patients with both high and low IFN signatures.

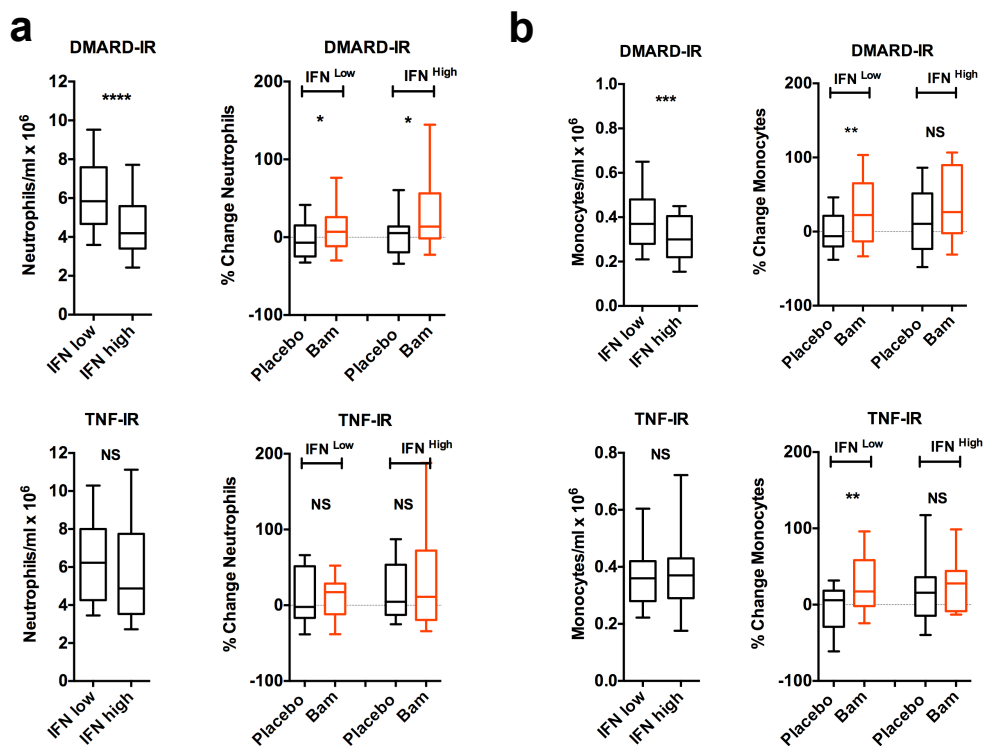

## Supplemental Figure 6:

### FACS analysis of the effects of baminercept treatment on peripheral blood lymphocyte subsets

FACS analysis was performed on a subset of the patients. Data are consistent with increased numbers of circulating T and B cells with the CD4+ T cells contributing more than the CD8+ T cells. CD16+, CD56+ NK cells decreased slightly in both studies in agreement with the qPCR analysis. Starting with whole blood, RBCs were lysed and the cells stained for the conventional markers. FACS counting beads were used to obtain absolute cell counts. Data are plotted as means and SEM of the absolute cell numbers and significance was determined with the Mann-Whitney test. FACS analyses were done at 2 central centers.

Given the limited nature of the data, we combined all of the patients treated with high dose baminercept (70 or 200 q2w cohorts) from both studies. Data included 20 placebo, 8 70 mg q2w and 16 200 mg q2w patients (DMARD-IR) and 7 placebo and 15 200 mg q2w patients (TNF-IR). Not all patients had FACS analyses from all three time points, among the 27 placebo treated patients, 66-68 out of 81 possible analyses (depending on the marker cocktail) and from the 39 baminercept treated patients 94-95 out of 117 possible analyses were complete.

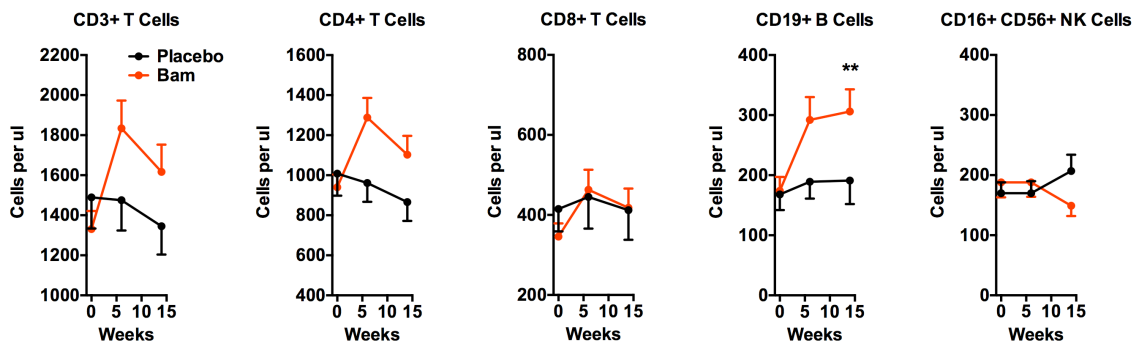

## Supplemental Figure 7:

### qPCR analysis on whole blood RNA of the effects of baminercept treatment on gene markers of myeloid subsets.

Expression of genes specific for myeloid subsets as defined by Abbas et al and Bennett et al or the Immunological Genome database: immature neutrophils, Defensin A3; plasmacytoid DC, CLEC4C (BDCA2) and LILRA4 (ILT7) and Dendritic cells, CD1E: monocytes and DC, SPARC and activated monocytes SLAMF7. Baminercept treatment in the DMARD-IR study included only the 70 and 200 mg q2w cohorts. Levels of Defensin A3 RNA decreased which may have been an artificial consequence of baminercept induced lymphocytosis. Likewise, ILT7 (pDC) increased with treatment potentially consistent with the general baminercept induced lymphocytosis (change in ILT7 correlated with the change in lymphocyte counts, Spearman  $r = 0.34$ ). The lack of a parallel change in CLEC4C is not understood. Significance was determined with a Mann-Whitney test.

Abbas, A. R., K. Wolslegel, D. Seshasayee, Z. Modrusan, and H. F. Clark. 2009. Deconvolution of blood microarray data identifies cellular activation patterns in systemic lupus erythematosus. *PLoS One* 4: e6098

Bennett, L., A. K. Palucka, E. Arce, V. Cantrell, J. Borvak, J. Banchereau, and V. Pascual. 2003. Interferon and granulopoiesis signatures in systemic lupus erythematosus blood. *J Exp Med* 197: 711-723

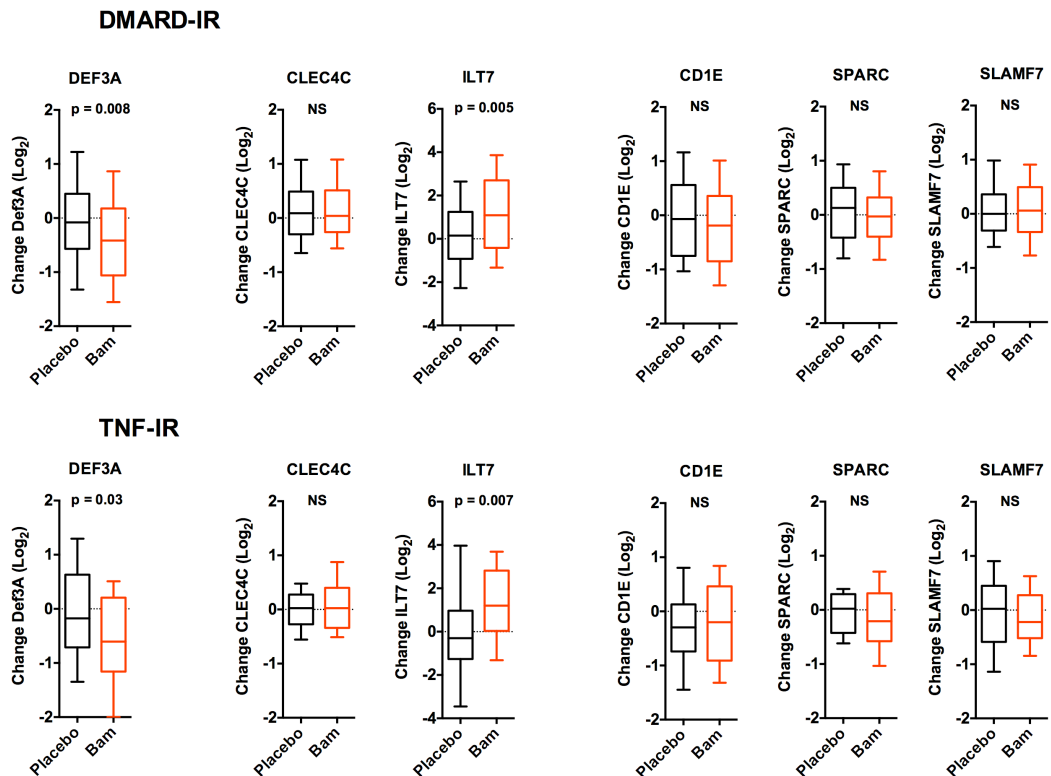



## Supplemental Figure 8:

### Effects of baminercept treatment on the Swollen Joint Count 28 (SJC28) scores in the DMARD-IR and TNF-IR studies.

(a) Baminercept treatment resulted in a trend towards reduced SJC28 numbers in the both studies. Statistical significance was determined with a two-tailed Mann-Whitney Test. In the DMARD-IR study, patients treated with 70 or 200 mg q2w were pooled. Patients were excluded if the baseline SJC28 was less than 8 (study inclusion criterion was 8 or more SJC using the 66 joint score). The number of patients in each group is indicated.

(b) Effects of baminercept treatment with either low or high baseline IFN signatures. IFN status was defined as a qPCR IFN score or less than (low) or greater (high) than 1.0. Data were pooled from the 70 and 200 mg q2w cohorts with the same baseline SJC28 greater than 7 requirement as above. The number of patients in this analysis were IFN low placebo 40, baminercept 82 and IFN high placebo 16, baminercept 32. The corresponding TNF-IR study was underpowered for this particular analysis.

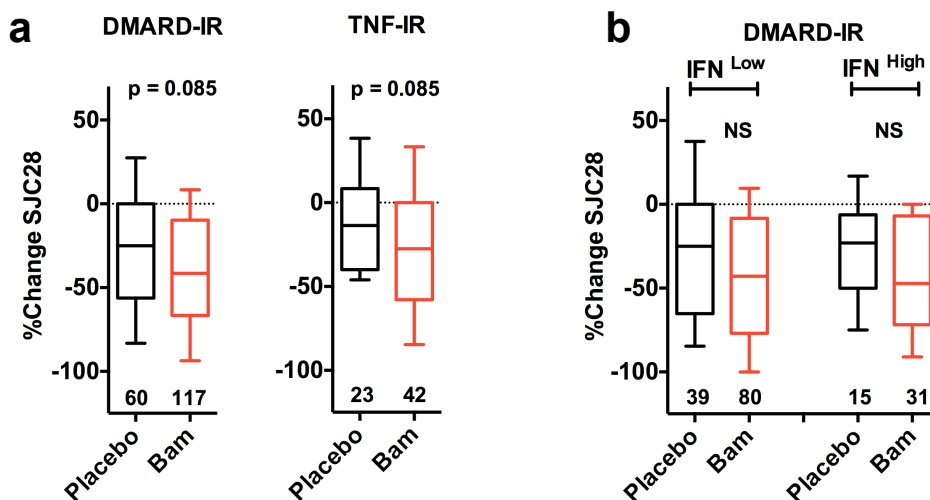

## Supplemental Figure 9:

### Little effect of baminercept treatment on CRP levels and Erythrocyte Sedimentation Rates (ESR) in the DMARD-IR and TNF-IR studies.

(a) Changes in CRP values following 14 weeks of baminercept treatment. Statistical significance was determined with a Mann-Whitney test. In the DMARD-IR study, patients treated with 70 or 200 mg q2w were pooled and patients with baseline cRP values below 0.1 mg/L were excluded. Given the disruptive effects on percent change of low baseline values, the data were also analyzed for the impact of baminercept on patients with starting values of CRP greater than 1.5 mg/dl. The number of patients in each group is indicated.

(b) Changes in ESR values following 14 weeks of baminercept treatment as assessed as above. High ESR values were greater than 40 mm/hr.

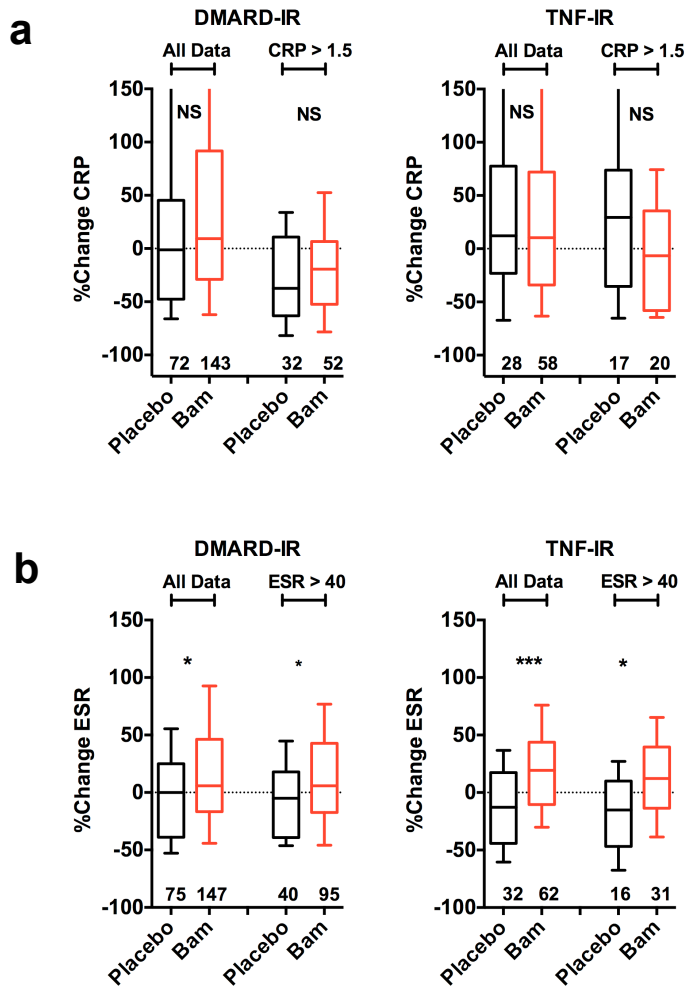

## Supplemental Figure 10:

The IFN signature status in RA patients does not correlate with clinical or serological parameters.

The baseline 3 gene qPCR score is plotted vs the baseline clinical parameters of CRP, ESR, SJC28, DAS28 ESR, rheumatoid factor (Rf) titer and anti-CCP status for the patients in the DMARD-IR study (placebo, 70 and 200 mg q2w) and all patients from the TNF-IR study. Results did not change with individual analysis of each study. In this analysis of the DMARD-IR and TNF-IR patients, 80% and 65% (respectively) were CCP antibody positive.

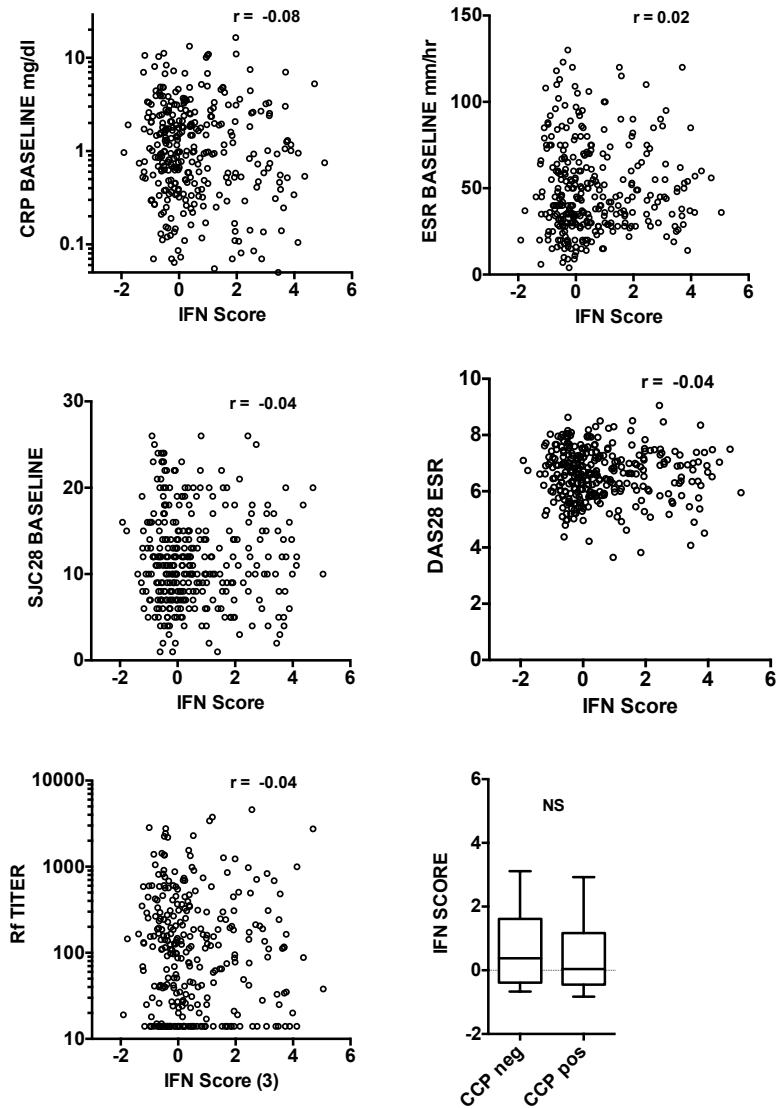

Supplement: pone.0112545.s001.pdf [file pone.0112545.s001.pdf]
